# Supplementary material for: Identification of an Endogenous Ligand Bound to a Native Orphan Nuclear Receptor
Source: PubMed Central journal article supplement (PMC2680617; doi:10.1371/journal.pone.0005609), 2009-05-19
Supplement: pone.0005609.s002.pdf [file pone.0005609.s002.pdf]

| LA bound to HNF4 $\alpha$ 2<br>(pmole) |                     |
|----------------------------------------|---------------------|
| [ <sup>1</sup> H]LA                    | [ <sup>2</sup> H]LA |
| 7.8                                    | ND                  |

**Figure S1. Binding of LA to HNF4 $\alpha$ 2 occurs within cells.**

COS-7 cells were transfected with rat HNF4 $\alpha$ 2 wt and cultured in medium with stripped serum. LA binding to HNF4 $\alpha$ 2 was determined as in Fig. 1 in the main text except that nuclear extracts were prepared with lysis buffer containing 30  $\mu$ M [<sup>2</sup>H]LA. [<sup>1</sup>H]LA-specific ions ( $m/z$  262 and 337) and [<sup>2</sup>H]LA-specific ions ( $m/z$  266 and 341) of the silylated derivative of LA were used for quantification by GC/MS. The detection limit for [<sup>2</sup>H]LA is less than 1 pmole. These results demonstrate that the LA that is bound to HNF4 $\alpha$ 2 is derived from endogenous [<sup>1</sup>H]LA within the cell, not from the exogenous [<sup>2</sup>H]LA that is unique to the lysis and extraction procedures. ND, not detectable.
