# Supplementary material for: Identification of an Endogenous Ligand Bound to a Native Orphan Nuclear Receptor
Source: PubMed Central journal article supplement (PMC2680617; doi:10.1371/journal.pone.0005609), 2009-05-19
Supplement: pone.0005609.s003.pdf [file pone.0005609.s003.pdf]

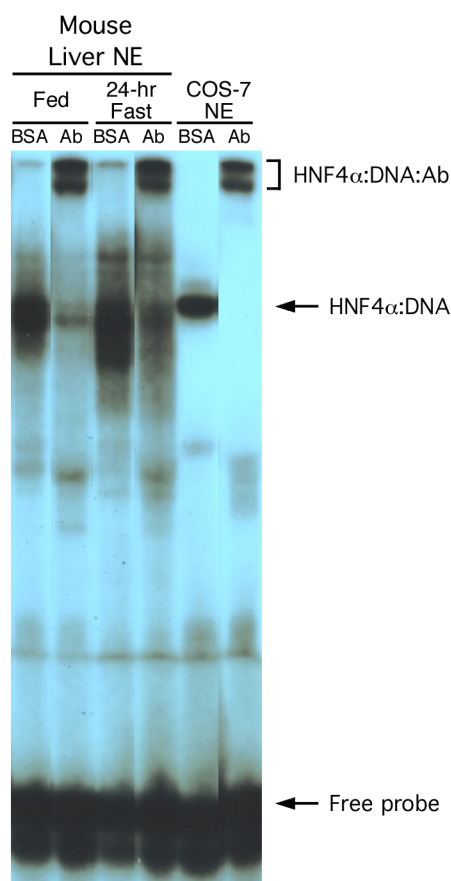

**Figure S2. HNF4 $\alpha$  from fasted mouse liver binds DNA.**

EMSA (electrophoretic mobility shift assay) using nuclear extract (NE) prepared from fed (Fed) and fasted (24-hr Fast) mouse liver (10  $\mu$ g total protein containing approximately 10 ng HNF4 $\alpha$  as determined by immunoblot analysis with a recombinant standard, not shown) and wild-type rat HNF4 $\alpha$ 2-transfected COS-7 cells on a  $^{32}$ P-labeled probe from the human ApoA1 promoter (5'-AGGGCAGGGGTCAAGGGTTCAGT-3', -210 to -188). See Materials and Methods in main text for details on NE preparation and EMSA conditions [1]. Total protein was normalized with bovine serum albumin (BSA). The  $\alpha$ 445 antibody (Ab, 1  $\mu$ g) was added as indicated. The HNF4 $\alpha$ 2:DNA and HNF4 $\alpha$ :DNA:Ab complexes and free probe are indicated. The lanes shown were reassembled from a single gel/exposure.

1. Jiang G, Nepomuceno L, Hopkins K, Sladek FM (1995) Exclusive homodimerization of the orphan nuclear receptor hepatocyte nuclear factor 4 defines a new subclass of nuclear receptors. *Mol Cell Bio* 15: 5131-5143.
