# Supplementary material for: Identification of an Endogenous Ligand Bound to a Native Orphan Nuclear Receptor
Source: PubMed Central journal article supplement (PMC2680617; doi:10.1371/journal.pone.0005609), 2009-05-19
Supplement: pone.0005609.s004.pdf [file pone.0005609.s004.pdf]

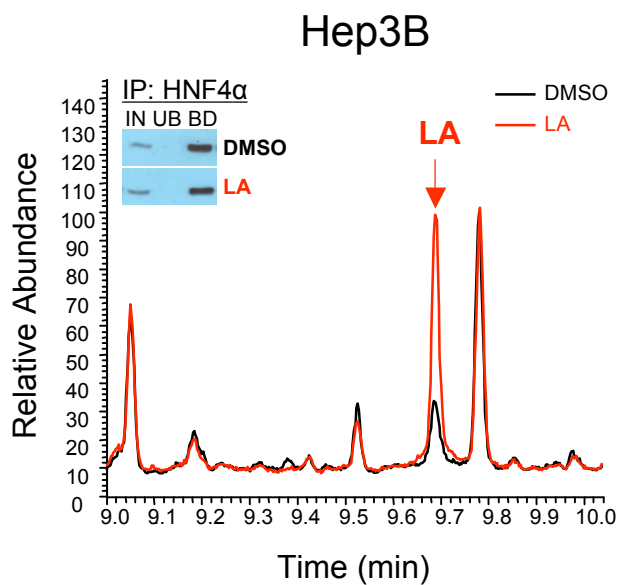

**Figure S3. Validation of experimental system for LA candidate gene identification I.**

GC/MS chromatogram and immunoblot (inset) showing HNF4 $\alpha$  immunoprecipitated (IP) from human hepatocellular carcinoma cells (Hep3B) cells after a 60-hr incubation in serum free media (DMEM plus fatty acid-free BSA) in the absence (DMSO) or presence of 30  $\mu$ M linoleic acid (LA). Inset: IN, input; UB, unbound; BD, bound. See main text for details on methods. The results show that these tissue culture conditions can effectively decrease the amount of LA bound to HNF4 $\alpha$  protein.
