# Supplementary material for: Identification of an Endogenous Ligand Bound to a Native Orphan Nuclear Receptor
Source: PubMed Central journal article supplement (PMC2680617; doi:10.1371/journal.pone.0005609), 2009-05-19
Supplement: pone.0005609.s005.pdf [file pone.0005609.s005.pdf]

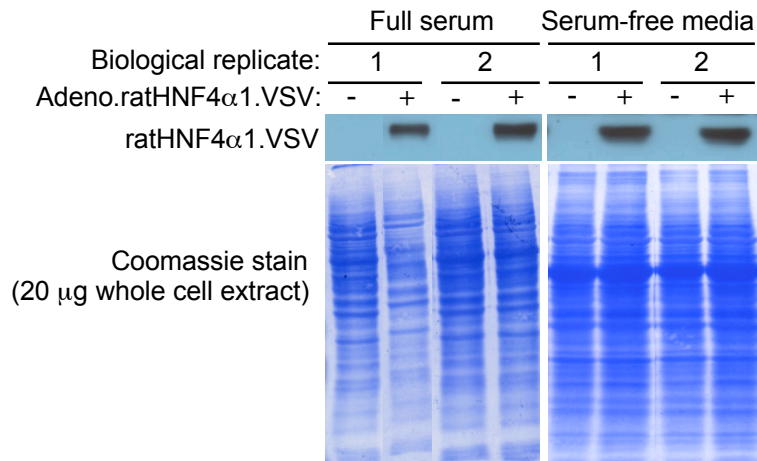**Figure S4. Validation of experimental system for LA candidate gene identification II.**

Immunoblot analysis of whole cell extracts showing a lack of endogenous HNF4 $\alpha$  in HCT116 cells and a robust expression of HNF4 $\alpha$  in cells infected with recombinant Adeno.ratHNF4 $\alpha$ 1.VSV incubated under the indicated media conditions. Coomassie stain (bottom panel) shows equal loading. Lanes are reassembled from two gels as indicated.
