# Supplementary material for: Identification of an Endogenous Ligand Bound to a Native Orphan Nuclear Receptor
Source: PubMed Central journal article supplement (PMC2680617; doi:10.1371/journal.pone.0005609), 2009-05-19
Supplement: pone.0005609.s007.pdf [file pone.0005609.s007.pdf]

**Table S1. Effect of linoleic acid on HNF4 $\alpha$  target genes (Affymetrix array results)**

| Gene Symbol       | Fold $\Delta$<br>by HNF4 | % $\Delta$<br>by LA | Gene Symbol               | Fold $\Delta$<br>by HNF4 | % $\Delta$<br>by LA |
|-------------------|--------------------------|---------------------|---------------------------|--------------------------|---------------------|
| <b>Up by LA</b>   |                          |                     | <b>Down by LA (cont.)</b> |                          |                     |
| MYB               | 3.7                      | +32.7               | CA2                       | 4.1                      | -27.2               |
| VIPR1             | 3.6                      | +27.0               | ABP1                      | 4.1                      | -44.6               |
| <b>Down by LA</b> |                          |                     | KLK7                      | 4.1                      | -27.9               |
| APOBEC1           | 102.2                    | -23.3               | SRG                       | 4.1                      | -28.5               |
| NR0B2             | 66.9                     | -53.2               | TRIM6                     | 4.1                      | -20.8               |
| HBA2              | 39.5                     | -43.8               | DSP                       | 4.0                      | -27.5               |
| HBA1              | 32.8                     | -38.4               | DGAT2                     | 4.0                      | -41.7               |
| <b>ABCG2</b>      | <b>24.4</b>              | <b>-41.2</b>        | CTNS                      | 4.8                      | -33.5               |
| LOC646927         | 21.5                     | -39.8               | CRLF3                     | 4.8                      | -41.3               |
| <b>SERPINE1</b>   | <b>21.2</b>              | <b>-49.4</b>        | ROR1                      | 4.8                      | -30.1               |
| <b>CYP1A2</b>     | <b>17.2</b>              | <b>-47.6</b>        | RBM20                     | 4.6                      | -26.5               |
| SEC14L2           | 15.3                     | -25.6               | TMEM116                   | 4.0                      | -35.6               |
| <b>SERPINA1</b>   | <b>14.3</b>              | <b>-29.7</b>        | NAGS                      | 4.0                      | -28.1               |
| SPHK1             | 12.1                     | -65.5               | CTSZ                      | 4.0                      | -28.1               |
| RTP3              | 11.7                     | -38.7               | DNM2                      | 3.9                      | -36.0               |
| DHRS3             | 10.9                     | -24.7               | TRIM15                    | 3.9                      | -24.6               |
| SEPP1             | 10.8                     | -23.4               | KRT7                      | 3.9                      | -29.3               |
| C6orf117          | 10.4                     | -23.2               | FAM110C                   | 3.7                      | -26.9               |
| ACSL5             | 10.0                     | -23.4               | ZNF557                    | 3.6                      | -40.1               |
| PKD2L1            | 9.2                      | -64.9               | C20orf112                 | 3.6                      | -30.3               |
| CALML4            | 9.2                      | -20.0               | PQLC2                     | 3.6                      | -59.2               |
| GDA               | 8.2                      | -35.8               | PIPOX                     | 3.6                      | -25.6               |
| CYP4F12           | 8.2                      | -64.7               | TJP3                      | 3.6                      | -34.3               |
| <b>AQP3</b>       | <b>7.6</b>               | <b>-30.3</b>        | NKX3-1                    | 3.5                      | -39.9               |
| BIN2              | 7.6                      | -42.9               | DKFZp666G057              | 3.5                      | -67.8               |
| TCF7              | 7.5                      | -47.3               | FOXO1A                    | 3.5                      | -29.5               |
| PDK4              | 7.2                      | -29.6               | KCNK5                     | 3.5                      | -53.5               |
| DIRAS3            | 7.2                      | -30.6               | SLC16A5                   | 3.4                      | -47.4               |
| KLK6              | 6.4                      | -22.9               | RBKS                      | 3.4                      | -37.4               |
| ARPM1             | 6.3                      | -63.5               | HTRA2                     | 3.4                      | -27.8               |
| PLCXD1            | 6.2                      | -23.8               | VPS13D                    | 3.4                      | -28.5               |
| ANKRD41           | 5.9                      | -34.2               | FAM101B                   | 3.3                      | -27.7               |
| SIRPA             | 5.7                      | -26.1               | SDC1                      | 3.3                      | -21.6               |
| KIAA1509          | 5.3                      | -24.1               | LOC646762                 | 3.3                      | -47.3               |
| IL32              | 5.2                      | -69.8               | CYP24A1                   | 3.3                      | -25.7               |
| MGC7036           | 5.1                      | -23.2               | NSUN6                     | 3.2                      | -26.9               |
| KCNQ4             | 5.1                      | -29.7               | PNPLA2                    | 3.2                      | -23.9               |
| C6orf141          | 4.9                      | -33.6               | STAP2                     | 3.2                      | -54.5               |
| OGG1              | 4.5                      | -30.2               | ZNF207                    | 3.1                      | -21.4               |
| TRIM10            | 4.4                      | -51.0               | LOC116236                 | 3.1                      | -40.0               |
| CDKN2C            | 4.3                      | -27.2               | TUBAL3                    | 3.1                      | -36.5               |
| KIAA1727          | 4.3                      | -21.5               | C1orf93                   | 3.1                      | -27.2               |
| MLXIPL            | 4.2                      | -29.9               | RBPMS2                    | 3.0                      | -27.9               |
|                   |                          |                     | FBXL15                    | 3.0                      | -39.1               |

Genes up-regulated >3.0-fold in human colorectal cancer (HCT116) cells by Adeno.ratHNF4 $\alpha$ 1.VSV with >20% change by LA and raw intensity values >50 (+HNF4 -LA); results are from expression profiling using human Affymetrix U133 2.0 arrays (average of duplicate arrays from biological triplicates). See main text for detailed methods. Genes in bold were verified by qRT-PCR (see Fig. 6 in main text).
