# Supplementary material for: Identification of an Endogenous Ligand Bound to a Native Orphan Nuclear Receptor
Source: PubMed Central journal article supplement (PMC2680617; doi:10.1371/journal.pone.0005609), 2009-05-19
Supplement: pone.0005609.s008.pdf [file pone.0005609.s008.pdf]

**Table S2. Primers used for Quantitative Real-Time PCR to verify HNF4 $\alpha$  target genes**

| Gene            | GenBank Accession Number | Projected Amplicon Length | Forward Primer 5'→3'  | Reverse Primer 5'→3' | Notes <sup>1</sup> |
|-----------------|--------------------------|---------------------------|-----------------------|----------------------|--------------------|
| <i>SERPINA1</i> | NM_001002236             | 134 bp                    | GTC AAGGACACCGAGGAAGA | TATTCATCAGCAGCACCCA  | QPPD               |
| <i>SERPINE1</i> | NM_000602                | 150 bp                    | CCATGCTCCAGCTGACAAC   | TGGTGCTGATCTCATCCTTG | Across exons 2-3   |
| <i>CYP1A2</i>   | NM_000761                | 63 bp                     | GGGCACTTCGACCCTTACAA  | GCACATGGCACCAATGACG  | QPPD               |
| <i>AQP3</i>     | NM_004925                | 211 bp                    | GACAGAAGGAGCTGGTGTCC  | ATGAGGATGCCCAGAGTGAC | Across exons 1-2   |
| <i>ABCG2</i>    | NM_004827                | 229 bp                    | CCTGAGATCCTGAGCCTTTG  | ATGCCTTCAGGTCATTGGAA | Across exons 1-2   |
| <i>PPIA</i>     | NM_021130                | 116 bp                    | CCCACCGTGTTCTTCGACAT  | CCAGTGCTCAGAGCACGAAA | QPPD               |

<sup>1</sup>Primer pairs were either selected from among the published sets within the Quantitative PCR Primer Database (QPPD, <http://web.ncifcrf.gov/rtp/gel/primerdb/default.asp>) or designed to span exon-exon boundaries using Primer3 (<http://frodo.wi.mit.edu/>).
